# Supplementary material for: Toxic Flatworm Egg Plates Serve as a Possible Source of Tetrodotoxin for Pufferfish
Source: MDPI journal article supplement (doi:10.3390/toxins11070402), 2019-07-11
Supplement: s1 [file s1]

# Supplementary Materials: Toxic Flatworm Egg Plates Serve as a Possible Source of Tetrodotoxin for Pufferfish

Taiki Okabe, Hikaru Oyama, Maho Kashitani, Yuta Ishimaru, Rei Suo, Haruo Sugita and Shiro Itoi

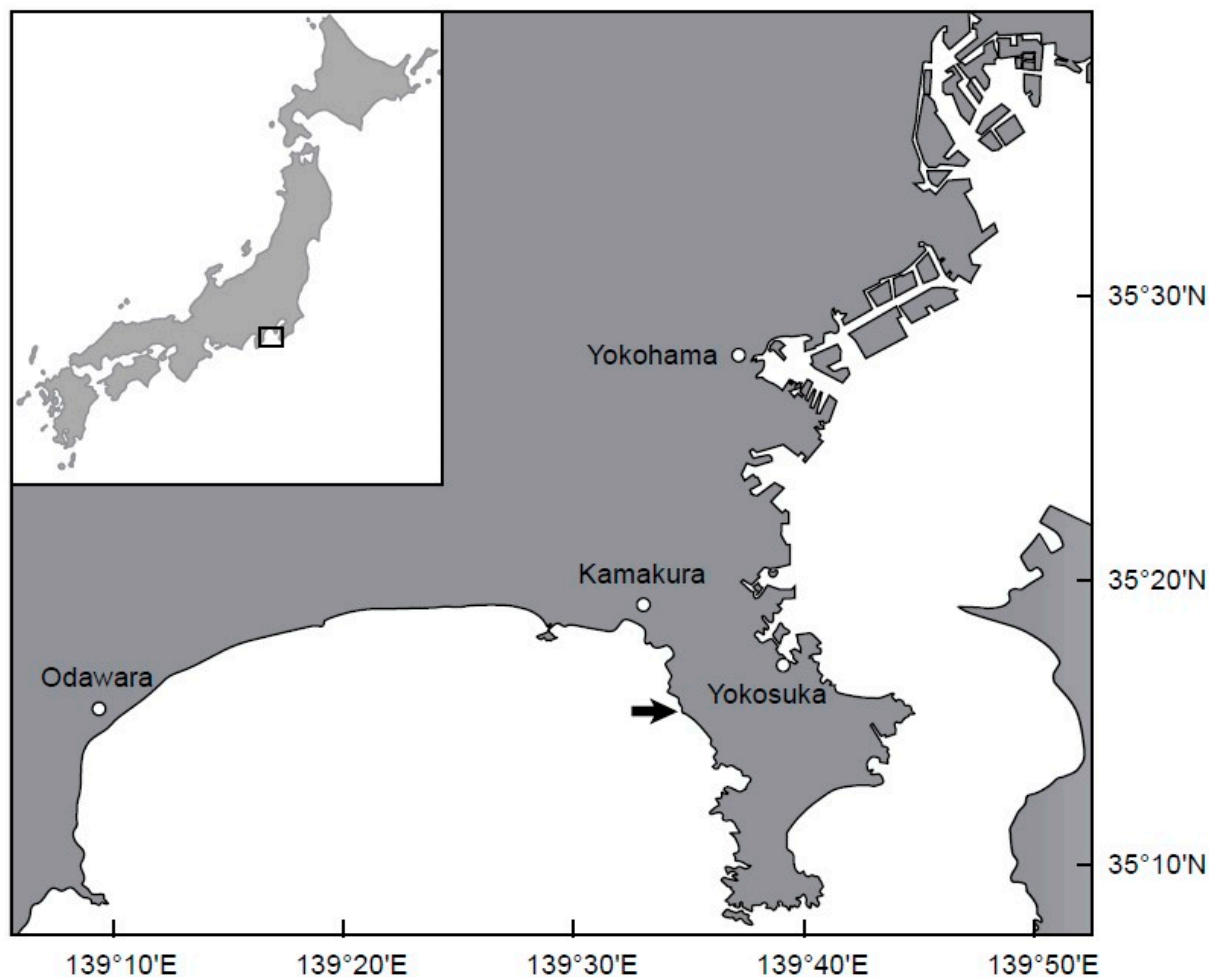

**Figure S1.** Sampling site of the flatworm *Planocera multitentaculata* egg plates and observation of the pufferfish behavior. Arrow in the map indicates the specific location of the sampling site (the intertidal zone of Hayama, Miura Peninsula, Japan).

**Video S1.** Predation process of the pufferfish *Takifugu niphobles* (at present *Takifugu alboplumbeus*) against the flatworm *Planocera multitentaculata* egg plates in the natural environment.

**Video S2.** Predation process of the pufferfish *Takifugu niphobles* (at present *Takifugu alboplumbeus*) against the flatworm *Planocera multitentaculata* egg plates in the laboratory.
