# Supplementary material for: Toxic Flatworm Egg Plates Serve as a Possible Source of Tetrodotoxin for Pufferfish
Source: Toxins (Basel). 2019 Jul 11;11(7):402. doi: 10.3390/toxins11070402 (PMC6669758; doi:10.3390/toxins11070402)
Supplement: Supplementary file 1 [file toxins-11-00402-s001.zip]

Archive with 4 entries (4 files):
- toxins-549022-SI.docx
- toxins-549022-SI.pdf
- Video S1.mp4
- Video S2.mp4
